# Supplementary material for: The Effect of Gut Microbiota-Targeted Interventions on Neuroinflammation and Motor Function in Parkinson’s Disease Animal Models—A Systematic Review
Source: MDPI journal article supplement (doi:10.3390/cimb46050244), 2024-04-26
Supplement: s1 [file s1]

Table S1. Individual SYRCLE risk of bias

| Article Identification                                                                                                                                                                                                                                | SYRCLE risk of bias |     |          |                        |                  |          |                           |          |                         |                             |                       |
|-------------------------------------------------------------------------------------------------------------------------------------------------------------------------------------------------------------------------------------------------------|---------------------|-----|----------|------------------------|------------------|----------|---------------------------|----------|-------------------------|-----------------------------|-----------------------|
|                                                                                                                                                                                                                                                       | Selection bias      |     |          |                        | Performance bias |          | Detection bias            |          | Attrition bias          | Reporting bias              | Other                 |
|                                                                                                                                                                                                                                                       | Sequence generation | SPF | Baseline | Allocation concealment | Random housing   | Blinding | Random outcome assessment | Blinding | Incomplete outcome data | Selective outcome reporting | Other sources of bias |
| Agathobaculum butyriciproducens shows Neuroprotective Effects in a 6-OHDA- Induced Mouse Model of Parkinson's Disease [1]                                                                                                                             | U                   | Y   | U        | U                      | Y                | U        | Y                         | U        | Y                       | Y                           | N                     |
| Alterations of the gut microbiota with antibiotics protects dopamine neuron loss and improve motor deficits in a pharmacological rodent model of Parkinson's disease. [2]                                                                             | U                   | N   | Y        | U                      | Y                | U        | U                         | Y        | U                       | U                           | N                     |
| Chronic Treatment with the Probiotics Lactacaseibacillus rhamnosus GG and Bifidobacterium lactis BB12 Attenuates Motor Impairment, Striatal Microglial Activation, and Dopaminergic Loss in Rats with 6-Hydroxydopamine-induced Hemiparkinsonism. [3] | U                   | N   | U        | U                      | Y                | U        | Y                         | Y        | Y                       | Y                           | N                     |
| Dysbiosis of gut microbiota inhibits NMNAT2 to promote neurobehavioral deficits and oxidative stress response in the 6-OHDA-lesioned rat model of Parkinson's disease [4]                                                                             | U                   | Y   | Y        | U                      | Y                | U        | Y                         | U        | Y                       | Y                           | N                     |
| Effects of the probiotic formulation SLAB51 in in vitro and in vivo Parkinson's disease models.[5]                                                                                                                                                    | U                   | N   | Y        | U                      | Y                | U        | U                         | Y        | U                       | U                           | N                     |
| Fecal Microbiota Transplantation Exerts a Protective Role in MPTP-Induced Parkinson's Disease via the TLR4/PI3K/AKT/NF-kappaB Pathway Stimulated by alpha-Synuclein.[6]                                                                               | U                   | N   | Y        | U                      | Y                | U        | Y                         | U        | Y                       | Y                           | N                     |

|                                                                                                                                                                                                                       |   |   |   |   |   |   |   |   |   |   |   |
|-----------------------------------------------------------------------------------------------------------------------------------------------------------------------------------------------------------------------|---|---|---|---|---|---|---|---|---|---|---|
| Fecal Microbiota Transplantation from Aged Mice Render Recipient Mice Resistant to MPTP-Induced Nigrostriatal Degeneration Via a Neurogenesis-Dependent but Inflammation-Independent Manner.[7]                       | U | N | U | U | Y | U | U | U | U | U | N |
| Fecal microbiota transplantation protects rotenone-induced Parkinson's disease mice via suppressing inflammation mediated by the lipopolysaccharide-TLR4 signaling pathway through the microbiota-gut-brain axis. [8] | U | N | Y | U | Y | U | U | Y | U | U | Y |
| Gut microbiota relieves inflammation in the substantia nigra of chronic Parkinson's disease by protecting the function of dopamine neurons [9]                                                                        | U | N | Y | U | U | U | U | U | U | U | Y |
| Healthy Human Fecal Microbiota Transplantation into Mice Attenuates MPTP-Induced Neurotoxicity via AMPK/SOD2 Pathway [10]                                                                                             | U | N | Y | U | Y | U | U | U | Y | Y | Y |
| Lactobacillus plantarum CCFM405 against Rotenone-Induced Parkinson's Disease Mice via Regulating Gut Microbiota and Branched-Chain Amino Acids Biosynthesis [11]                                                      | U | N | Y | U | Y | U | Y | Y | Y | N | Y |
| Lactobacillus plantarum PS128 alleviates neurodegenerative progression in 1-methyl-4-phenyl-1,2,3,6-tetrahydropyridine-induced mouse models of Parkinson's disease [12]                                               | U | Y | Y | U | Y | U | U | Y | Y | Y | Y |
| Neuroprotective and Immunomodulatory Effects of Probiotics in a Rat Model of Parkinson's Disease. [13]                                                                                                                | U | N | Y | U | Y | U | U | U | Y | Y | N |
| Neuroprotective effects associated with immune modulation by selected lactic acid bacteria in a Parkinson's disease model. [14]                                                                                       | U | Y | Y | U | Y | U | U | U | Y | Y | N |
| Neuroprotective Effects of Bifidobacterium breve CCFM1067 in MPTP-Induced Mouse Models of Parkinson's Disease [15]                                                                                                    | U | N | U | U | U | U | U | U | U | N | Y |
| Neuroprotective effects of fecal microbiota transplantation on MPTP-induced Parkinson's disease mice: Gut microbiota, glial reaction and TLR4/TNF-alpha signaling pathway. [16]                                       | U | Y | Y | U | Y | U | U | U | U | U | Y |
| Neuroprotective Effects of Lactobacillus plantarum PS128 in a Mouse Model of Parkinson's Disease: The Role of Gut Microbiota and MicroRNAs [17]                                                                       | U | N | U | U | Y | U | U | U | U | U | Y |

|                                                                                                                                                                                   |   |   |   |   |   |   |   |   |   |   |   |
|-----------------------------------------------------------------------------------------------------------------------------------------------------------------------------------|---|---|---|---|---|---|---|---|---|---|---|
| Neurotrophic Role of the Next-Generation Probiotic Strain <i>L. lactis</i> MG1363-pMG36e-GLP-1 on Parkinson's Disease via Inhibiting Ferroptosis. [18]                            | Y | N | U | U | Y | U | U | U | U | U | Y |
| Polymannuronic acid prebiotic plus <i>Lactcaseibacillus rhamnosus</i> GG probiotic as a novel synbiotic promoted their separate neuroprotection against Parkinson's disease. [19] | U | N | U | U | Y | U | U | U | Y | Y | Y |
| Probiotic <i>Clostridium butyricum</i> ameliorated motor deficits in a mouse model of Parkinson's disease via gut microbiota-GLP-1 pathway. [20]                                  | U | N | Y | U | U | U | U | U | U | U | Y |
| Probiotic Enhancement of Antioxidant Capacity and Alterations of Gut Microbiota Composition in 6-Hydroxydopamin-Induced Parkinson's Disease Rats [21]                             | U | N | Y | U | Y | U | U | U | Y | Y | Y |
| Probiotic <i>Pediococcus pentosaceus</i> ameliorates MPTP-induced oxidative stress via regulating the gut microbiota-gut-brain axis. [22]                                         | U | N | Y | U | Y | U | U | U | U | N | Y |
| Probiotics Alleviate the Progressive Deterioration of Motor Functions in a Mouse Model of Parkinson's Disease [23]                                                                | U | N | U | U | Y | U | U | U | U | Y | N |
| Probiotics mixture increases butyrate, and subsequently rescues the nigral dopaminergic neurons from MPTP and rotenone-induced neurotoxicity. [24]                                | U | N | U | U | Y | U | U | Y | U | U | N |
| Rifaximin Modifies Gut Microbiota and Attenuates Inflammation in Parkinson's Disease: Preclinical and Clinical Studies. [25]                                                      | U | N | U | U | Y | U | U | U | Y | U | Y |
| Antibiotic-induced microbiome depletion protects against MPTP-induced dopaminergic neurotoxicity in the brain. [26]                                                               | U | N | Y | U | Y | U | U | U | U | Y | N |
| Vancomycin Pretreatment on MPTP-Induced Parkinson's Disease Mice Exerts Neuroprotection by Suppressing Inflammation Both in Brain and Gut. [27]                                   | U | Y | U | U | Y | U | U | U | U | U | Y |
| The impact of dextran sodium sulphate and probiotic pre-treatment in a murine model of Parkinson's disease [28]                                                                   | U | N | Y | U | Y | U | U | Y | U | U | Y |
| Therapeutic effect of GLP-1 engineered strain on mice model of Alzheimer's disease and Parkinson's disease [29]                                                                   | U | N | Y | U | Y | U | U | U | U | N | N |

## References

1. Lee, D.W.; Ryu, Y.-K.; Chang, D.-H.; Park, H.-Y.; Go, J.; Maeng, S.-Y.; Hwang, D.Y.; Kim, B.-C.; Lee, C.-H.; Kim, K.-S. Agathobaculum Butyriciproducens Shows Neuroprotective Effects in a 6-OHDA-Induced Mouse Model of Parkinson's Disease. *J. Microbiol. Biotechnol.* **2022**, *32*, 1168–1177, doi:10.4014/jmb.2205.05032.
2. Koutzoumis, D.N.; Vergara, M.; Pino, J.; Buddendorff, J.; Khoshbouei, H.; Mandel, R.J.; Torres, G.E. Alterations of the Gut Microbiota with Antibiotics Protects Dopamine Neuron Loss and Improve Motor Deficits in a Pharmacological Rodent Model of Parkinson's Disease. *Exp. Neurol.* **2020**, *325*, 113159, doi:10.1016/j.expneurol.2019.113159.
3. Cuevas-Carbonell, S.G.; Vásquez-Celaya, L.; García-López, D.; Granados-Patrón, D.; García-Miss, M.D.R.; Álvarez-Cervera, F.J.; Mut-Martín, M.; Parra, I.; Mendieta, L.; Salgado, H.; et al. Chronic Treatment with the Probiotics Lactocaseibacillus Rhamnosus GG and Bifidobacterium Lactis BB12 Attenuates Motor Impairment, Striatal Microglial Activation, and Dopaminergic Loss in Rats with 6-Hydroxydopamine-Induced Hemiparkinsonism. *Neuroscience* **2022**, *507*, 79–98, doi:10.1016/j.neuroscience.2022.11.004.
4. Yu, J.; Meng, J.; Qin, Z.; Yu, Y.; Liang, Y.; Wang, Y.; Min, D. Dysbiosis of Gut Microbiota Inhibits NMNAT2 to Promote Neurobehavioral Deficits and Oxidative Stress Response in the 6-OHDA-Lesioned Rat Model of Parkinson's Disease. *J. Neuroinflammation* **2023**, *20*, 117, doi:10.1186/s12974-023-02782-1.
5. Castelli, V.; d'Angelo, M.; Lombardi, F.; Alfonsetti, M.; Antonosante, A.; Catanesi, M.; Benedetti, E.; Palumbo, P.; Cifone, M.G.; Giordano, A.; et al. Effects of the Probiotic Formulation SLAB51 in in Vitro and in Vivo Parkinson's Disease Models. *Aging* **2020**, *12*, 4641–4659, doi:10.18632/aging.102927.
6. Zhong, Z.; Chen, W.; Gao, H.; Che, N.; Xu, M.; Yang, L.; Zhang, Y.; Ye, M. Fecal Microbiota Transplantation Exerts a Protective Role in MPTP-Induced Parkinson's Disease via the TLR4/PI3K/AKT/NF- $\kappa$ B Pathway Stimulated by  $\alpha$ -Synuclein. *Neurochem. Res.* **2021**, *46*, 3050–3058, doi:10.1007/s11064-021-03411-0.
7. Qiao, C.-M.; Zhou, Y.; Quan, W.; Ma, X.-Y.; Zhao, L.-P.; Shi, Y.; Hong, H.; Wu, J.; Niu, G.-Y.; Chen, Y.-N.; et al. Fecal Microbiota Transplantation from Aged Mice Render Recipient Mice Resistant to MPTP-Induced Nigrostriatal Degeneration Via a Neurogenesis-Dependent but Inflammation-Independent Manner. *Neurother. J. Am. Soc. Exp. Neurother.* **2023**, *20*, 1405–1426, doi:10.1007/s13311-023-01420-1.
8. Zhao, Z.; Ning, J.; Bao, X.-Q.; Shang, M.; Ma, J.; Li, G.; Zhang, D. Fecal Microbiota Transplantation Protects Rotenone-Induced Parkinson's Disease Mice via Suppressing Inflammation Mediated by the Lipopolysaccharide-TLR4 Signaling Pathway through the Microbiota-Gut-Brain Axis. *Microbiome* **2021**, *9*, 226, doi:10.1186/s40168-021-01107-9.
9. Zhang, T.; Wang, T.; Chen, X.; Zhao, Z.; Chen, Z. Gut Microbiota Relieves Inflammation in the Substantia Nigra of Chronic Parkinson's Disease by Protecting the Function of Dopamine Neurons. *Exp. Ther. Med.* **2022**, *23*, 52, doi:10.3892/etm.2021.10974.
10. Xie, Z.; Zhang, M.; Luo, Y.; Jin, D.; Guo, X.; Yang, W.; Zheng, J.; Zhang, H.; Zhang, L.; Deng, C.; et al. Healthy Human Fecal Microbiota Transplantation into Mice Attenuates MPTP-Induced Neurotoxicity via AMPK/SOD2 Pathway. *Aging Dis.* **2023**, *14*, 2193–2214, doi:10.14336/AD.2023.0309.
11. Chu, C.; Yu, L.; Li, Y.; Guo, H.; Zhai, Q.; Chen, W.; Tian, F. Lactobacillus Plantarum CCFM405 against Rotenone-Induced Parkinson's Disease Mice via Regulating Gut Microbiota and Branched-Chain Amino Acids Biosynthesis. *Nutrients* **2023**, *15*, 1737, doi:10.3390/nu15071737.
12. Liao, J.-F.; Cheng, Y.-F.; You, S.-T.; Kuo, W.-C.; Huang, C.-W.; Chiou, J.-J.; Hsu, C.-C.; Hsieh-Li, H.-M.; Wang, S.; Tsai, Y.-C. Lactobacillus Plantarum PS128 Alleviates Neurodegenerative Progression in 1-Methyl-4-Phenyl-1,2,3,6-Tetrahydropyridine-Induced Mouse Models of Parkinson's Disease. *Brain. Behav. Immun.* **2020**, *90*, 26–46, doi:10.1016/j.bbi.2020.07.036.
13. Parra, I.; Martínez, I.; Vásquez-Celaya, L.; Gongora-Alfaro, J.L.; Tizabi, Y.; Mendieta, L. Neuroprotective and Immunomodulatory Effects of Probiotics in a Rat Model of Parkinson's Disease. *Neurotox. Res.* **2023**, *41*, 187–200, doi:10.1007/s12640-022-00627-y.
14. Perez Visñuk, D.; Savoy de Giori, G.; LeBlanc, J.G.; de Moreno de LeBlanc, A. Neuroprotective Effects Associated with Immune Modulation by Selected Lactic Acid Bacteria in a Parkinson's Disease Model. *Nutr. Burbank Los Angel. Cty. Calif* **2020**, *79–80*, 110995, doi:10.1016/j.nut.2020.110995.
15. Li, T.; Chu, C.; Yu, L.; Zhai, Q.; Wang, S.; Zhao, J.; Zhang, H.; Chen, W.; Tian, F. Neuroprotective Effects of Bifidobacterium Breve CCFM1067 in MPTP-Induced Mouse Models of Parkinson's Disease. *Nutrients* **2022**, *14*, 4678, doi:10.3390/nu14214678.

16. Sun, M.-F.; Zhu, Y.-L.; Zhou, Z.-L.; Jia, X.-B.; Xu, Y.-D.; Yang, Q.; Cui, C.; Shen, Y.-Q. Neuroprotective Effects of Fecal Microbiota Transplantation on MPTP-Induced Parkinson's Disease Mice: Gut Microbiota, Glial Reaction and TLR4/TNF- $\alpha$  Signaling Pathway. *Brain. Behav. Immun.* **2018**, *70*, 48–60, doi:10.1016/j.bbi.2018.02.005.
17. Lee, Y.Z.; Cheng, S.-H.; Chang, M.-Y.; Lin, Y.-F.; Wu, C.-C.; Tsai, Y.-C. Neuroprotective Effects of Lactobacillus Plantarum PS128 in a Mouse Model of Parkinson's Disease: The Role of Gut Microbiota and MicroRNAs. *Int. J. Mol. Sci.* **2023**, *24*, 6794, doi:10.3390/ijms24076794.
18. Yue, M.; Wei, J.; Chen, W.; Hong, D.; Chen, T.; Fang, X. Neurotrophic Role of the Next-Generation Probiotic Strain L. Lactis MG1363-pMG36e-GLP-1 on Parkinson's Disease via Inhibiting Ferroptosis. *Nutrients* **2022**, *14*, 4886, doi:10.3390/nu14224886.
19. Liu, X.; Du, Z.R.; Wang, X.; Sun, X.R.; Zhao, Q.; Zhao, F.; Wong, W.T.; Wong, K.H.; Dong, X.-L. Polymannuronic Acid Prebiotic plus Lactibacillus Rhamnosus GG Probiotic as a Novel Synbiotic Promoted Their Separate Neuroprotection against Parkinson's Disease. *Food Res. Int. Off. Ont* **2022**, *155*, 111067, doi:10.1016/j.foodres.2022.111067.
20. Sun, J.; Li, H.; Jin, Y.; Yu, J.; Mao, S.; Su, K.-P.; Ling, Z.; Liu, J. Probiotic Clostridium Butyricum Ameliorated Motor Deficits in a Mouse Model of Parkinson's Disease via Gut Microbiota-GLP-1 Pathway. *Brain. Behav. Immun.* **2021**, *91*, 703–715, doi:10.1016/j.bbi.2020.10.014.
21. Tsao, S.-P.; Nurrahma, B.A.; Kumar, R.; Wu, C.-H.; Yeh, T.-H.; Chiu, C.-C.; Lee, Y.-P.; Liao, Y.-C.; Huang, C.-H.; Yeh, Y.-T.; et al. Probiotic Enhancement of Antioxidant Capacity and Alterations of Gut Microbiota Composition in 6-Hydroxydopamin-Induced Parkinson's Disease Rats. *Antioxid. Basel Switz.* **2021**, *10*, 1823, doi:10.3390/antiox10111823.
22. Pan, S.; Wei, H.; Yuan, S.; Kong, Y.; Yang, H.; Zhang, Y.; Cui, X.; Chen, W.; Liu, J.; Zhang, Y. Probiotic Pedicoccus Pentosaceus Ameliorates MPTP-Induced Oxidative Stress via Regulating the Gut Microbiota-Gut-Brain Axis. *Front. Cell. Infect. Microbiol.* **2022**, *12*, 1022879, doi:10.3389/fcimb.2022.1022879.
23. Hsieh, T.-H.; Kuo, C.-W.; Hsieh, K.-H.; Shieh, M.-J.; Peng, C.-W.; Chen, Y.-C.; Chang, Y.-L.; Huang, Y.-Z.; Chen, C.-C.; Chang, P.-K.; et al. Probiotics Alleviate the Progressive Deterioration of Motor Functions in a Mouse Model of Parkinson's Disease. *Brain Sci.* **2020**, *10*, 206, doi:10.3390/brainsci10040206.
24. Srivastav, S.; Neupane, S.; Bhurtel, S.; Katila, N.; Maharjan, S.; Choi, H.; Hong, J.T.; Choi, D.-Y. Probiotics Mixture Increases Butyrate, and Subsequently Rescues the Nigral Dopaminergic Neurons from MPTP and Rotenone-Induced Neurotoxicity. *J. Nutr. Biochem.* **2019**, *69*, 73–86, doi:10.1016/j.jnutbio.2019.03.021.
25. Hong, C.-T.; Chan, L.; Chen, K.-Y.; Lee, H.-H.; Huang, L.-K.; Yang, Y.-C.S.H.; Liu, Y.-R.; Hu, C.-J. Rifaximin Modifies Gut Microbiota and Attenuates Inflammation in Parkinson's Disease: Preclinical and Clinical Studies. *Cells* **2022**, *11*, 3468, doi:10.3390/cells11213468.
26. Pu, Y.; Chang, L.; Qu, Y.; Wang, S.; Zhang, K.; Hashimoto, K. Antibiotic-Induced Microbiome Depletion Protects against MPTP-Induced Dopaminergic Neurotoxicity in the Brain. *Aging* **2019**, *11*, 6915–6929, doi:10.18632/aging.102221.
27. Cui, C.; Hong, H.; Shi, Y.; Zhou, Y.; Qiao, C.-M.; Zhao, W.-J.; Zhao, L.-P.; Wu, J.; Quan, W.; Niu, G.-Y.; et al. Vancomycin Pretreatment on MPTP-Induced Parkinson's Disease Mice Exerts Neuroprotection by Suppressing Inflammation Both in Brain and Gut. *J. Neuroimmune Pharmacol. Off. J. Soc. NeuroImmune Pharmacol.* **2023**, *18*, 72–89, doi:10.1007/s11481-021-10047-y.
28. Dwyer, Z.; Chaquin, M.; Landrigan, J.; Ayoub, K.; Shail, P.; Rocha, J.; Childers, C.L.; Storey, K.B.; Philpott, D.J.; Sun, H.; et al. The Impact of Dextran Sodium Sulphate and Probiotic Pre-Treatment in a Murine Model of Parkinson's Disease. *J. Neuroinflammation* **2021**, *18*, 20, doi:10.1186/s12974-020-02062-2.
29. Fang, X.; Zhou, X.; Miao, Y.; Han, Y.; Wei, J.; Chen, T. Therapeutic Effect of GLP-1 Engineered Strain on Mice Model of Alzheimer's Disease and Parkinson's Disease. *AMB Express* **2020**, *10*, 80, doi:10.1186/s13568-020-01014-6.
