# Supplementary material for: The Effect of Gut Microbiota-Targeted Interventions on Neuroinflammation and Motor Function in Parkinson’s Disease Animal Models—A Systematic Review
Source: MDPI journal article supplement (doi:10.3390/cimb46050244), 2024-04-26
Supplement: s1 [file s1]

## PRISMA-S Checklist

| Section/topic                          | #  | Checklist item                                                                                                                                                                                                                                                     | Location(s) Reported |
|----------------------------------------|----|--------------------------------------------------------------------------------------------------------------------------------------------------------------------------------------------------------------------------------------------------------------------|----------------------|
| <b>INFORMATION SOURCES AND METHODS</b> |    |                                                                                                                                                                                                                                                                    |                      |
| Database name                          | 1  | Name each individual database searched, stating the platform for each.                                                                                                                                                                                             | Page 4               |
| Multi-database searching               | 2  | If databases were searched simultaneously on a single platform, state the name of the platform, listing all of the databases searched.                                                                                                                             | NA                   |
| Study registries                       | 3  | List any study registries searched.                                                                                                                                                                                                                                | NA                   |
| Online resources and browsing          | 4  | Describe any online or print source purposefully searched or browsed (e.g., tables of contents, print conference proceedings, web sites), and how this was done.                                                                                                   | NA                   |
| Citation searching                     | 5  | Indicate whether cited references or citing references were examined, and describe any methods used for locating cited/citing references (e.g., browsing reference lists, using a citation index, setting up email alerts for references citing included studies). | Page 4               |
| Contacts                               | 6  | Indicate whether additional studies or data were sought by contacting authors, experts, manufacturers, or others.                                                                                                                                                  | Page 4               |
| Other methods                          | 7  | Describe any additional information sources or search methods used.                                                                                                                                                                                                | NA                   |
| <b>SEARCH STRATEGIES</b>               |    |                                                                                                                                                                                                                                                                    |                      |
| Full search strategies                 | 8  | Include the search strategies for each database and information source, copied and pasted exactly as run.                                                                                                                                                          | Page 4               |
| Limits and restrictions                | 9  | Specify that no limits were used, or describe any limits or restrictions applied to a search (e.g., date or time period, language, study design) and provide justification for their use.                                                                          | Page 4               |
| Search filters                         | 10 | Indicate whether published search filters were used (as originally designed or modified), and if so, cite the filter(s) used.                                                                                                                                      | Page 4               |
| Prior work                             | 11 | Indicate when search strategies from other literature reviews were adapted or reused for a substantive part or all of the search, citing the previous review(s).                                                                                                   | NA                   |
| Updates                                | 12 | Report the methods used to update the search(es) (e.g., rerunning searches, email alerts).                                                                                                                                                                         | NA                   |

|                         |    |                                                                                                                                    |        |
|-------------------------|----|------------------------------------------------------------------------------------------------------------------------------------|--------|
| Dates of searches       | 13 | For each search strategy, provide the date when the last search occurred.                                                          | Page 4 |
| <b>PEER REVIEW</b>      |    |                                                                                                                                    |        |
| Peer review             | 14 | Describe any search peer review process.                                                                                           | Page 4 |
| <b>MANAGING RECORDS</b> |    |                                                                                                                                    |        |
| Total Records           | 15 | Document the total number of records identified from each database and other information sources.                                  | Page 7 |
| Deduplication           | 16 | Describe the processes and any software used to deduplicate records from multiple database searches and other information sources. | Page 4 |

PRISMA-S: An Extension to the PRISMA Statement for Reporting Literature Searches in Systematic Reviews  
Rethlefsen ML, Kirtley S, Waffenschmidt S, Ayala AP, Moher D, Page MJ, Koffel JB, PRISMA-S Group.  
Last updated February 27, 2020.
