# Supplementary material for: The Effect of Gut Microbiota-Targeted Interventions on Neuroinflammation and Motor Function in Parkinson’s Disease Animal Models—A Systematic Review
Source: Curr Issues Mol Biol. 2024 Apr 26;46(5):3946–74. doi: 10.3390/cimb46050244 (PMC11120577; doi:10.3390/cimb46050244)
Supplement: Supplementary file 1 [file cimb-46-00244-s001.zip]

Archive with 5 entries (5 files):
- File S1 - PRISMA Checklist.pdf
- File S2 - PRISMA Abstracts Checklist.pdf
- File S3 - PRISMA-S Checklist.pdf
- File S4 - SWiM Checklist.pdf
- Table S1 - Individual SYRCLE risk of bias.pdf
